# Supplementary material for: Polyaniline based charcoal/Ni nanocomposite material for high performance supercapacitors
Source: Royal Society of Chemistry journal article supplement (doi:10.1039/c7se00490g), 2018-01-01
Supplement: c7se00490g1.pdf [file c7se00490g1.pdf]

## Polyaniline based Charcoal/Ni nanocomposite material for High Performance Supercapacitor

E. Elanthamilan <sup>a</sup>, A. Sathiyar <sup>a</sup>, S. Rajkumar <sup>a</sup>, E. Joan Sheryl <sup>b</sup>, J. Princy Merlin <sup>a\*</sup>

<sup>a\*</sup> Department of Chemistry, Bishop Heber College (Autonomous), Tiruchirappalli-620017,  
Tamilnadu, India.

<sup>b</sup> Department of Electronics and Communication Engineering, St. Joseph's College of  
Engineering, Chennai-600119, Tamilnadu, India.

*Corresponding Author: Dr. J. Princy Merlin*

*E-mail: pmej\_68@yahoo.co.in, Mob: +91-9443427625*

---

### Supplementary Files

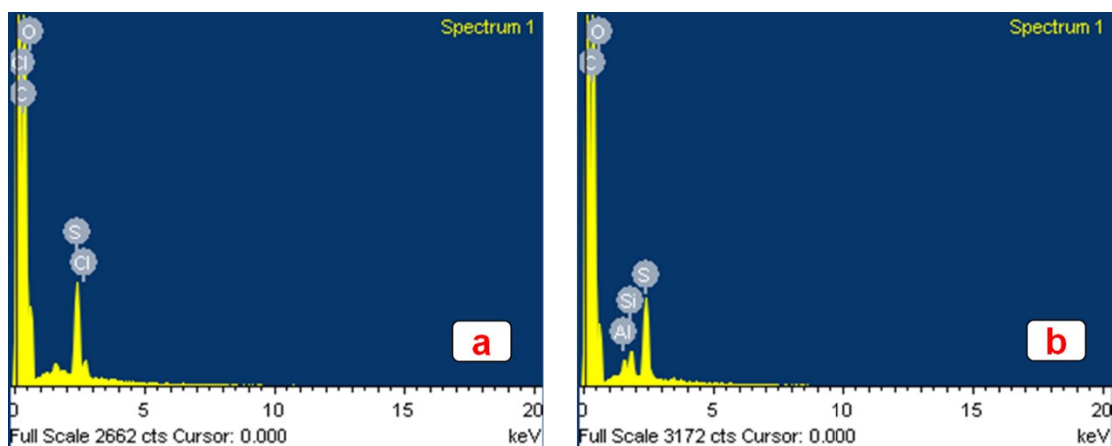

**Fig. S1: EDX images of a) bare PANI and b) PANI/AC nanocomposite**

**Table S1: Weight and Atomic Percentage of bare PANI**

| <b>Element</b> | <b>Weight %</b> | <b>Atomic %</b> |
|----------------|-----------------|-----------------|
| C K            | 71.27           | 78.10           |
| O K            | 24.59           | 20.23           |
| S K            | 3.41            | 1.40            |
| Cl K           | 0.73            | 0.20            |
| <b>Total</b>   | <b>100</b>      |                 |

**Table S2: Weight and Atomic Percentage of PANI/AC**

| <b>Element</b> | <b>Weight %</b> | <b>Atomic %</b> |
|----------------|-----------------|-----------------|
| C K            | 74.21           | 80.80           |
| O K            | 20.93           | 17.11           |
| Al K           | 0.60            | 0.29            |
| Si K           | 0.95            | 0.49            |
| S K            | 3.31            | 1.35            |
| <b>Total</b>   | <b>100</b>      |                 |

**Table S3: Weight and Atomic Percentage of PANI/AC/Ni**

| <b>Element</b> | <b>Weight %</b> | <b>Atomic %</b> |
|----------------|-----------------|-----------------|
| C K            | 82.06           | 86.70           |
| O K            | 10.54           | 7.32            |
| Ni K           | 7.40            | 5.97            |
| <b>Total</b>   | <b>100</b>      |                 |
